1

## BRIEF REPORT

2

3

### **Rapidly Increasing SARS-CoV-2 Neutralization by Intravenous Immunoglobulins**

4

### **Produced from Plasma Collected During the 2020 Pandemic**

5

6

Maria R. Farcet,<sup>1</sup> Michael Karbiener,<sup>1</sup> Julia Schwaiger,<sup>1</sup> Reinhard Ilk,<sup>2</sup> Thomas R. Kreil<sup>1</sup>

7

<sup>1</sup>Global Pathogen Safety, Baxter AG (part of Takeda), Vienna, Austria

8

<sup>2</sup>Global Manufacturing Sciences, Baxter AG (part of Takeda), Vienna, Austria

9

10

11 Correspondence: Thomas R. Kreil, PhD, Takeda, Benatzkygasse 2-6, 1221 Vienna, Austria.

12

Phone: +43 1 20100 247 3860. Fax: +43 1 20100 247 5783.

13

E-mail: [thomas.kreil@takeda.com](mailto:thomas.kreil@takeda.com)

14

15

**SUMMARY:** The ongoing COVID-19 pandemic has resulted in seroconversion of a

16

significant proportion of the US plasma donor population, and thus SARS-CoV-2 neutralizing

17

antibodies are now present in commercial immunoglobulin lots fractionated from US-sourced

18

plasma.

19

20

21

**RUNNING TITLE:** SARS-CoV-2 neutralization in commercial IVIG

22

**WORD COUNT Abstract:** 97 words

23

**WORD COUNT:** 1,900 words

24 **Footnotes**

25

26 **Potential conflicts of interest**

27 Authors are employees of Baxter AG, Vienna, Austria, now part of the Takeda group of  
28 companies. MRF, MK, RI and TRK have Takeda stock interest.

29

30 **Financial support**

31 This study was funded by Baxter AG, now a Takeda Company.

32

33 **Presented in part**

34 The results have not been presented anywhere else.

35

36 **Correspondence and requests for reprints**

37 Thomas R. Kreil, PhD

38 Takeda, Benatzkygasse 2-6, 1221 Vienna, Austria.

39 Phone: +43 1 20100 247 3860. Fax: +43 1 20100 247 5783.

40 E-mail: [thomas.kreil@takeda.com](mailto:thomas.kreil@takeda.com)

41 **Abstract**

42 Immunoglobulin (IG) lots (N=176) released since March 2020 were tested for SARS-CoV-2  
43 neutralizing antibodies, with first positive results for September 2020 lots, mean = 1.8 IU/ml,  
44 46% of lots positive. From there, values steadily increased, in correlation with the cumulative  
45 COVID-19 incidence, to reach a mean of 36.7 IU/ml and 93% of lots positive by January  
46 2021. Extrapolating the correlation, IGs could reach an anti-SARS-CoV-2 potency of  
47 ~400 IU/ml by July 2021. At that stage, prophylactic IG treatment for primary/secondary  
48 immunodeficiency could contain similar doses of anti-SARS-CoV-2 as convalescent plasma  
49 which is used for treatment of COVID-19.

50

51 **Keywords**

52 Primary immunodeficiency; Secondary immunodeficiency; SARS-CoV-2; SARS coronavirus  
53 2 antibody potency; neutralizing antibodies; COVID-19; intravenous immune globulin;  
54 immunoglobulin; plasma; prophylaxis

## 55 **Background**

56 People with primary and secondary immunodeficiencies (PID / SID) need substitution therapy  
57 with antibodies prepared from the plasma of healthy donors in the form of immunoglobulin  
58 (IG) preparations. For emerging agents, however, the plasma donor community is initially  
59 seronaïve, and thus IG preparations cannot afford protection against these new infectious  
60 agents.

61 After the emergence of another zoonotic Coronavirus in humans, Severe acute  
62 respiratory syndrome coronavirus-2 (SARS-CoV-2), it was initially unclear whether past  
63 infection with other, seasonally circulating Human coronaviruses (HCoV) would have  
64 induced cross-protective antibodies to the new virus. Using the gold standard virus  
65 neutralization test this was shown not to be the case, i.e. intravenous immunoglobulins (IVIG)  
66 produced from plasma collected before the Corona virus disease 2019 (COVID-19) pandemic  
67 did not neutralize SARS-CoV-2 [1].

68 By the end of 2020, close to 100 million COVID-19 cases had been reported globally,  
69 with almost a quarter of them in the US alone [2]. The US is quantitatively the most important  
70 origin of plasma for fractionation [3], and thus an increasing proportion of the plasma supply  
71 will be collected from donors post COVID-19, plasma that is now expected to also carry  
72 antibodies to SARS-CoV-2.

73 Here, we report the results from an investigation into the seroconversion of the US  
74 supply of plasma for fractionation, through testing of IVIGs derived exclusively from US  
75 plasma for SARS-CoV-2 neutralization, which revealed rapidly increasing antibody titers  
76 which correlated with cumulative COVID-19 incidence. Together with the characterization of  
77 SARS-CoV-2 neutralizing antibody (nAb) titers in a large collection of COVID-19  
78 convalescent plasma (CP) donations, this permits a near-term projection of potentially

79 protective SARS-CoV-2 antibody levels in future IG lots, particularly when used in a  
80 prophylactic setting for substitution therapy.

## 81 **Methods**

### 82 **Immunoglobulin preparations**

83 A total of 176 IVIG lots (Gammagard Liquid; Baxter Healthcare Corp., Westlake Village,  
84 CA) released between March 2020 and January 2021 from plasma collected by  
85 plasmapheresis (source plasma) in the US were analyzed. For a subset of 12 of these IVIG  
86 lots, information about the dates of plasma collection was obtained.

87

### 88 **COVID-19 convalescent plasma samples**

89 438 COVID-19 CP samples collected between March and July 2020 were obtained from  
90 Austrian (n = 300) and US (n = 138) plasma donation centers (BioLife). The samples  
91 originated from donors who had PCR-confirmed SARS-CoV-2 infections or who described a  
92 disease progression consistent with COVID-19 and for which SARS-CoV-2 neutralization  
93 was confirmed. Information on disease severity was requested from each donor. Donors  
94 signed informed consent and agreed to additional testing.

95

### 96 **Measurement of SARS-CoV-2 and HCoV-229E neutralizing antibodies**

97 SARS-CoV-2 and HCoV-229E neutralizing antibody (nAb) titers were determined using  
98 materials and methods previously reported [1]. Briefly, 2-fold serially diluted samples were  
99 incubated with equal volumes of SARS-CoV-2 (strain “BavPat1/2020”, Charité Berlin,  
100 Germany) or HCoV-229E (for IVIG samples, Cat. no. VR-740, ATCC, Rockville, MD) at  
101  $10^{3.0}$  tissue culture infectious doses 50% per milliliter (TCID<sub>50</sub>/ml) and incubated for 150 min  
102 before titration on Vero cells (for SARS-CoV-2; Cat. no. 84113001, ECACC, Porton Down,  
SARS-CoV-2 neutralization in commercial IVIG

103 Salisbury, UK) or MRC-5 cells (for HCoV-229E; Cat. no. CCL-171, ATCC) in eight-fold  
104 replicates per dilution. The virus-induced cytopathic effect was determined after 5-7 days of  
105 incubation. The reciprocal sample dilution resulting in 50% virus neutralization (NT<sub>50</sub>; SARS-  
106 CoV-2 detection limit in IVIG:  $\leq 1:2$ ) was determined using the Spearman-Kärber formula,  
107 and the calculated neutralization titer for 50% of the wells reported as 1:X. For further  
108 analyses, samples with a neutralization titer below the detection limit were assigned a value of  
109 0.5x the detection limit. The National Institute of Biological Standards and Control (NIBSC,  
110 Potters Bar, UK) research reagent 20/130, for which a potency in international units has  
111 recently been assigned [4], was included in the study and the concentration of SARS-CoV-2  
112 nAbs therefore reported in IU/ml.

113 Testing was done using a fully validated analytical method (for SARS-CoV-2 nAbs) or a  
114 controlled assay that included several validity criteria, i.e. confirmatory titration of input virus  
115 infectivity and cell viability (for HCoV-229E nAbs).

116

## 117 **Graphs and statistical analysis**

118 Overall COVID-19 incidence in the US was taken from the Centers for Disease Control and  
119 Prevention (CDC) COVID data tracker [2]. Data analysis and visualization was done using  
120 GraphPad Prism v8.1.1 (San Diego, CA), R Studio v1.1.383 (Boston, MA), Minitab v. 17.3.1  
121 (State College, PA) and Microsoft Excel.

122 Mean SARS-CoV-2 antibody values for IVIG lots released in a month were correlated  
123 against the cumulative incidence of COVID-19 in the US that was recorded 6 months prior to  
124 IVIG release, e.g. the mean antibody potency measured for IVIG lots released in September  
125 2020 was correlated against cumulative COVID-19 incidence in the US in March 2020. A  
126 log-transformed linear model and a polynomial regression model indicated comparable  
127 quality of fit and both were used to calculate an extrapolation beyond the period for which  
SARS-CoV-2 neutralization in commercial IVIG

128 antibody measurements were made. The slope at the highest observed cumulative incidence  
129 (i.e. July 2020; 1.39%) was used for extending the models in a linear manner.

130

## 131 **Results**

### 132 **SARS-CoV-2 and HCoV-229E neutralizing antibodies in commercial IVIG preparations**

133 SARS-CoV-2 nAbs were undetectable for IVIG lots released to the market between March  
134 and August 2020 (n = 63). For IVIG lots released in September 2020, 12 of 26 lots (46%)  
135 were seropositive with a mean SARS-CoV-2 nAb concentration of 1.8 IU/ml (Figure 1A).  
136 From there onwards, the proportion of SARS-CoV-2 nAb positive IVIG lots steadily  
137 increased, with mean nAb concentrations of 3.0 (n = 7/13; 54%) in October, 4.8 (n = 20/30;  
138 67%) in November, 12.1 (n = 16/17; 94%) in December, and 36.7 (n = 25/27; 93%) IU/ml for  
139 January 2021, respectively (Figure 1A).

140 HCoV-229E nAb titers of the same IVIG lots remained at similar levels throughout  
141 the period surveyed (Figure 1A) and the observed variations in HCoV-229E nAb titers were  
142 similar to previously observed ranges [1].

143

### 144 **COVID-19 incidence in the US and development of SARS-CoV-2 antibody content**

145 For the first 12 IVIG lots that contained measurable SARS-CoV-2 nAbs, the time of  
146 collection for the several thousand plasma units used for production was analyzed. On  
147 average, plasma was collected six months before IVIG lot release. Thus, the cumulative  
148 incidence as the underlying cause for the seroprevalence in any given month would be  
149 expected to determine the level of antibodies present in IVIG lots released six months later.  
150 The low SARS-CoV-2 antibody content of IVIG lots released in September 2020 would thus  
151 on average be derived from plasma collected in March 2020, when the cumulative COVID-19

152 incidence was 0.06% of the US population (Figure 1A). By July 2020, the cumulative  
153 incidence had increased to 1.39%, i.e. about 20-fold, and similarly the mean SARS-CoV-2  
154 antibody concentration increased from 1.8 IU/ml for September 2020 IVIG lots, to 36.7 IU/ml  
155 for IVIG lots released in January 2021 (Figure 1A). Based on the increasing cumulative  
156 COVID-19 incidence since August 2020, an estimation of SARS-CoV-2 nAb concentrations  
157 in future IVIG lots is possible (Figure 1B). Given a cumulative incidence of 7.94% in  
158 January 2021, IG lots to be released in July 2021 are expected to contain a mean SARS-CoV-  
159 2 nAb concentration of around 400 IU/ml (Figure 1B).

160

### 161 **SARS-CoV-2 neutralizing antibodies in COVID-19 convalescent plasma samples**

162 A large collective of COVID-19 CP units (n = 438) was tested with the gold standard  
163 neutralization assay for anti-SARS-CoV-2 potency and the results reported in relation to the  
164 newly assigned WHO standard [4]. The mean SARS-CoV-2 nAb concentration was 301  
165 IU/ml (Figure 2: IU/ml histogram, median 156, 20<sup>th</sup> percentile 75, 80<sup>th</sup> percentile 353, range <  
166 2 - 6,937). A mean of 516 IU/ml was determined for all units above the median (n = 218) and  
167 a mean of 945 IU/ml for the top 20% of CP characterized in this study (n = 88). No SARS-  
168 CoV-2 nAbs were detected in the sample of one donor who had PCR-confirmed SARS-CoV-  
169 2 infection. Most donors had experienced asymptomatic or mild COVID-19 (75% of  
170 samples), around 9% of samples originated from donors who had recovered from severe  
171 COVID-19.

172

### 173 **Discussion**

174 The cumulative incidence of past COVID-19 cases, i.e. the proportion of individuals expected  
175 to be SARS-CoV-2 antibody positive, in the US in any given month forms the basis for  
176 seropositivity in IG lots released to the market approximately six months later. This prediction



177 assumes a constant proportion of asymptomatic infections to COVID-19 cases, as they, too,  
178 are expected to result in antibody positive plasma donors.

179 For the extrapolation of future SARS-CoV-2 neutralizing antibody concentrations in  
180 IG, consideration of only past COVID-19 cases is very conservative. With large vaccination  
181 campaigns under way at this moment, approximately 9.6% of the US population has already  
182 been vaccinated by the end of January 2021 [2]. Vaccine-induced antibodies will thus further  
183 increase the anti-SARS-CoV-2 potency of future lots of IGs, and based on the current  
184 cumulative incidence of 7.94% in addition to a 9.6% vaccination rate, and higher mRNA  
185 vaccine-induced antibody titers than post-COVID [5, 6], the anti-SARS-CoV-2 potency of  
186 future IG products may potentially be higher than the SARS-CoV-2 potency extrapolated here  
187 (Figure 1B).

188 To date, the level of SARS-CoV-2 neutralizing antibody titers required in IG to  
189 provide protection against COVID-19 has not been determined. A comparison of the antibody  
190 potency contained in CP, to those expected in IG soon may provide for some perspective.

191 In a large cohort of COVID-19 convalescents, a median anti-SARS-CoV-2 potency of  
192 156 IU/ml was determined (Figure 2). The original US FDA emergency use authorization for  
193 transfusion of CP required use of plasma at a potency of above the median, as determined by  
194 a high throughput binding assay [7, 8]. The mean neutralization potency of above median  
195 units of the cohort of samples tested here is 516 IU/ml. Joyner et al. [7] did, however, report  
196 significantly better clinical success when using CP above the 80<sup>th</sup> percentile, the mean of  
197 which in neutralization potency is 945 IU/ml. With about 200 ml used for CP transfusion, this  
198 would equate to SARS-CoV-2-neutralizing antibody doses of 103,200 IU and 189,000 IU,  
199 respectively.

200 By July 2021, IGs can be extrapolated to contain a mean potency of approximately  
201 400 IU/ml, of which standard prophylaxis regimen for PID / SID would apply approximately

202 500 mg IG/kg, resulting in the administration of 350 ml IG for a 70 kg person, or a dose of  
203 140,000 IU. While the total doses would be quite similar, it has become evident that CP  
204 treatment was more successful when administered at early stages of COVID-19 [9, 10], i.e.  
205 before extensive virus spread within respiratory and other organs. Regular IG substitution  
206 therapy for the treatment of PID and SID represents prophylaxis, i.e. antibody administration  
207 even before virus exposure, and thus should have a significantly better likelihood of success.  
208 This prospect is of particular importance for PID patients, for whom a 10-fold higher COVID-  
209 19 mortality rate has been reported [11]. The above calculations are quite conservative, as in  
210 the US already now the proportion of vaccinated individuals has surpassed those with post  
211 COVID-19, a trend that can be expected to accelerate in the months to come. In addition,  
212 currently available data indicate superior levels of SARS-CoV-2 antibodies after mRNA-  
213 based vaccines as currently in use in the US [5, 6]. Cumulatively, these circumstances would  
214 appear to support rapidly increasing levels of SARS-CoV-2 antibodies in IG, so that IG-  
215 mediated protection against COVID-19 for regularly substituted PID / SID seems quite  
216 possible. More research to confirm the extrapolations from this study is currently under way.  
217 For COVID-19 treatment, rather than prophylaxis, a hyper-IVIG manufactured exclusively  
218 from plasma of COVID-19 convalescent donors is currently under evaluation in a phase III  
219 clinical trial [12].

220 **Funding**

221 No additional financial support was received.

222

223 **Acknowledgments**

224 The contributions of the entire Global Pathogen Safety team, most notably Melanie Graf,  
225 Simone Knotzer, Jasmin de Silva, Stefan Pantic, Brigitte Kainz, Julius Segui (neutralization  
226 assays), Veronika Sulzer, Sabrina Brandtner (cell culture), Eva Ha and Alexandra  
227 Schlapschy-Danzinger (virus culture), Kathrin Nagl (IVIG logistics) as well as Eva  
228 Gschaider-Reichhart (data collection) are gratefully acknowledged. Harold Batista  
229 (production planning) compiled plasma donation dates. Colleagues from BioLife Austria and  
230 US, especially Nadja Frankl and Kathryn Barrett supplied CP samples. SARS-CoV-2 was  
231 sourced via EVAg (supported by the European Community) and kindly provided by Christian  
232 Drosten and Victor Corman (Charité Universitätsmedizin, Institute of Virology, Berlin,  
233 Germany).

234 **References**

- 235 1. Schwaiger J, Karbiener M, Aberham C, et al. No SARS-CoV-2 Neutralization by  
236 Intravenous Immunoglobulins produced from Plasma Collected Before the 2020 Pandemic. *J*  
237 *Infect Dis* **2020**; 222:1960-4.
- 238 2. Centers for Disease Control and Prevention (CDC) COVID Data Tracker; available at  
239 [covid.cdc.gov/covid-data-tracker/#datatracker-home](https://covid.cdc.gov/covid-data-tracker/#datatracker-home) (last accessed Feb 10, 2021).
- 240 3. Weinstein M. Regulation of plasma for fractionation in the United States. *Ann Blood* **2018**;  
241 3:1-15.
- 242 4. Mattiuzzo G, Bentley EM, Hassall, et al. Establishment of the WHO International Standard  
243 and Reference Panel for anti-SARS-CoV-2 antibody. WHO/BS/2020.2403; available at  
244 [www.who.int/publications/m/item/WHO-BS-2020.2404](http://www.who.int/publications/m/item/WHO-BS-2020.2404) (last accessed Feb 10, 2021).
- 245 5. Jackson LA, Anderson EJ, Rouphael NG, et al. An mRNA vaccine against SARS-CoV-2 –  
246 preliminary report. *N Engl J Med* **2020**; 383:1920-31.
- 247 6. Walsh EE, Frenck RW, Falsey AR, et al. Safety and immunogenicity of two RNA-based  
248 COVID-19 vaccine candidates. *N Engl J Med* **2020**; 383:2439-50.
- 249 7. Joyner MJ, Carter RE, Senefeld JW, et al. Convalescent plasma antibody levels and the risk of  
250 death from COVID-19. *N Engl J Med*. **2021**; DOI: 10.1056/NEJMoa2031893
- 251 8. Letter of Authorization, Reissuance of Convalescent Plasma EUA, February 4, **2021**.  
252 Available at: <https://www.fda.gov/media/141477/download?source=email>; last accessed Feb  
253 10, 2021.
- 254 9. Libster R, Marc GP, Wappner D, et al. Early high-titer plasma therapy to prevent severe  
255 COVID-19 in older adults. *NEJM* **2021**; DOI: 10.1056/NEJMoa2033700.

- 256 10. Simonovich VA, Burgos Pratz LD, Scibona P, et al. A randomized trial of convalescent  
257 plasma in COVID-19 severe pneumonia. *NEJM* **2020**. DOI: 10.1056/NEJMoa2031304
- 258 11. Delavari S, Abolhassani H, Abolnezhadian F, et al. Impact of SARS-CoV-2 pandemic on  
259 patients with Primary Immunodeficiency. *J Clin Immunol* **2021**; 41:345-55.
- 260 12. Inpatient Treatment With Anti-Coronavirus Immunoglobulin (ITAC), ClinicalTrials.gov  
261 Identifier: NCT04546581. Available at <https://clinicaltrials.gov/ct2/show/NCT04546581>; last  
262 accessed Feb 10, 2021.
- 263

264 **FIGURE LEGENDS**

265

266 **Figure 1** (A) SARS-CoV-2 (●) neutralizing antibody concentration and Human coronavirus  
267 229E (■) neutralizing antibody titers in 176 commercial IVIG lots manufactured from March  
268 2020 until January 2021; mean values  $\pm$  95% confidence interval are indicated, the number of  
269 IVIG lots for which SARS-CoV-2 neutralization was detected and the total number of IVIG  
270 lots tested are indicated for each month. SARS-CoV-2 incidence ( $\diamond$ ) in the US population  
271 (confirmed cases per million) is shown. (B) Prediction model of SARS-CoV-2 antibody  
272 development in future IVIG lots. Significant curvilinearity (red solid line; P-value = 0.006)  
273 was seen in the relationship between -6 months COVID-19 cumulative incidence in the US  
274 population and measured SARS-CoV-2 antibody concentrations in IVIG lots ( $\blacklozenge$ ). The slope at  
275 the upper end of the observation range was used for linear extrapolation (grey dotted line) of  
276 SARS-CoV-2 antibody concentrations in IVIG lots that will be released in the coming months  
277 (●). Abbreviations: IVIG, intravenous immunoglobulin; IU/ml, international units per  
278 milliliter;  $\mu$ NT50, 50% neutralization titer; SARS-CoV-2, Severe acute respiratory syndrome  
279 coronavirus 2.

280

281 **Figure 2.** Characterization of 438 COVID-19 convalescent plasma samples collected in  
282 Austrian and US BioLife Plasma centers. SARS-CoV-2 neutralizing antibody content is  
283 reported as  $\log_2$  [IU/ml] against relative frequency of occurrence (%). Median, 20% and 80%  
284 percentile values are indicated as IU/ml. Abbreviations: IU/ml, international units per  
285 milliliter; SARS-CoV-2, Severe acute respiratory syndrome coronavirus 2.

286

287

288

289

290 **Figure 1A.**

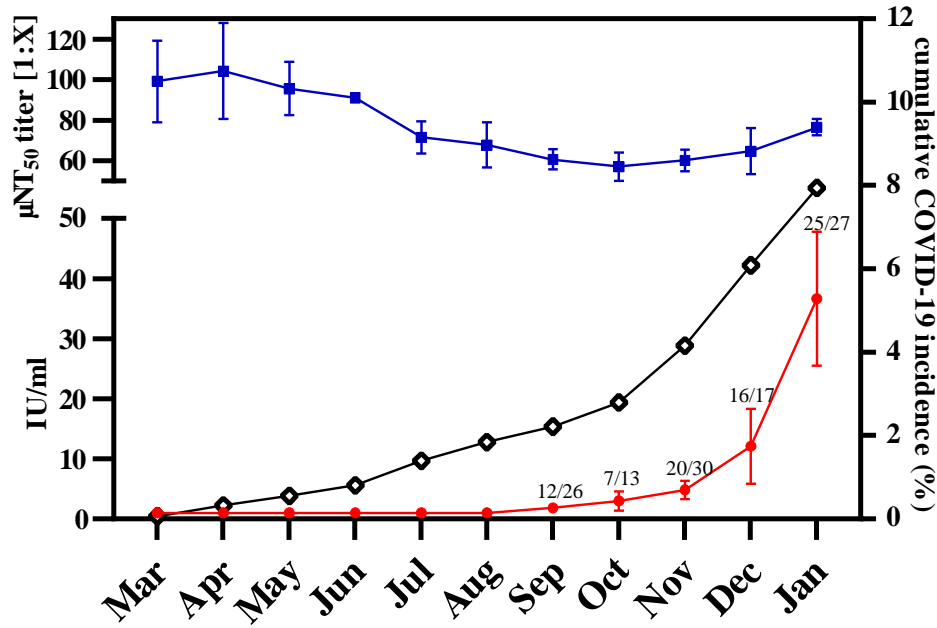

291

292 **Figure 1B.**

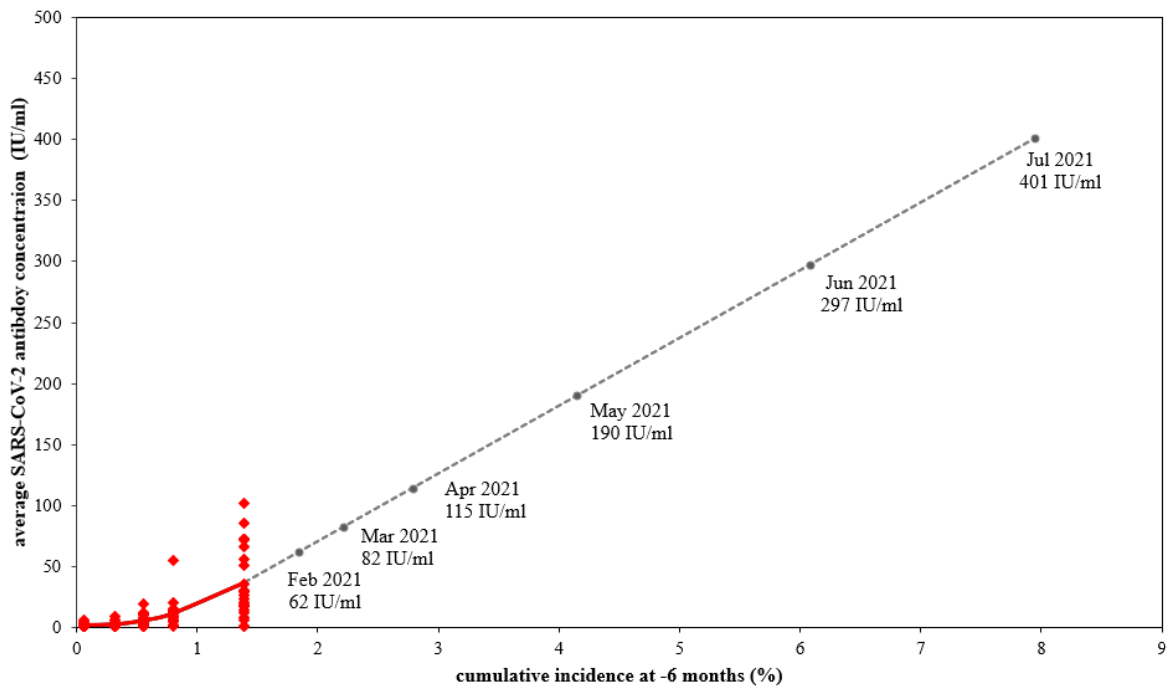

293

294

295 **Figure 2.**

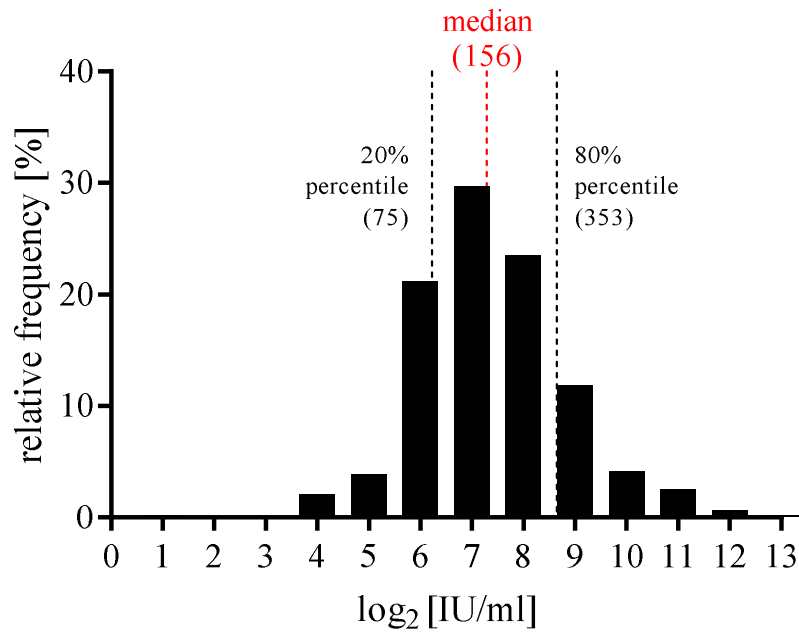

296
